# Supplementary material for: Essential Nutrients, Added Sugar Intake, and Epigenetic Age in Midlife Black and White Women: NIMHD Social Epigenomics Program
Source: PubMed Central journal article supplement (PMC11287388; doi:10.1001/jamanetworkopen.2024.22749), 2024-07-29
Supplement: jamanetwopen-e2422749-s001.pdf [file jamanetwopen-e2422749-s001.pdf]

## Data Sharing Statement

Chiu. Essential Nutrients, Added Sugar Intake, and Epigenetic Age in Midlife Black and White Women. *JAMA Netw Open*. Published July 29, 2024.

doi:10.1001/jamanetworkopen.2024.22749

### Data

**Data available:** No

### Additional Information

**Explanation for why data not available:** Data supporting the findings for this analysis are available by contacting corresponding author DTC and shareable upon reasonable request.
